# Supplementary material
Source: MDPI journal article supplement (https://www.mdpi.com/1999-4907/14/2/184)
Supplement: s1 [file s1]

## Supplementary materials

**Table S1.** Heterotrophic CO<sub>2</sub>-C  $\mu\text{g C m}^2 \text{ h}^{-1}$  flux estimation model coefficients

| <i>Predictors</i>                                    | <i>Estimates</i> | <b>CO<sub>2</sub>_het</b> |  | <i>p</i> |
|------------------------------------------------------|------------------|---------------------------|--|----------|
|                                                      |                  | <i>CI</i>                 |  |          |
| (Intercept)                                          | -9530.94         | -17469.10 – -1592.77      |  | 0.019    |
| T soil                                               | 2165.37          | 1793.70 – 2537.04         |  | <0.001   |
| Land use [Betula]                                    | 16184.78         | 8093.06 – 24276.49        |  | <0.001   |
| Land use [Pinus]                                     | 14563.10         | 6449.75 – 22676.46        |  | 0.001    |
| Land use [Vegetation]                                | 4142.48          | -4084.46 – 12369.42       |  | 0.322    |
| GWL                                                  | 93.70            | 27.87 – 159.52            |  | 0.006    |
| <b>Random Effects</b>                                |                  |                           |  |          |
| $\sigma^2$                                           |                  | 94764159.73               |  |          |
| $\tau_{00}$ Cycle                                    |                  | 20433080.35               |  |          |
| $\tau_{00}$ Object                                   |                  | 21825871.77               |  |          |
| ICC                                                  |                  | 0.31                      |  |          |
| N Object                                             |                  | 15                        |  |          |
| N Cycle                                              |                  | 16                        |  |          |
| Observations                                         |                  | 176                       |  |          |
| Marginal R <sup>2</sup> / Conditional R <sup>2</sup> |                  | 0.655 / 0.761             |  |          |

**Table S2.** CH<sub>4</sub>-C flux estimation model coefficients

| <i>Predictors</i>                                    | <b>Log_CH<sub>4</sub>_norm</b> |               |          |
|------------------------------------------------------|--------------------------------|---------------|----------|
|                                                      | <i>Estimates</i>               | <i>CI</i>     | <i>p</i> |
| (Intercept)                                          | 1.36                           | -0.96 – 3.67  | 0.249    |
| Land use [Betula]                                    | -2.14                          | -5.24 – 0.96  | 0.175    |
| Land use [Pinus]                                     | -4.19                          | -7.65 – -0.73 | 0.018    |
| Land use [Vegetation]                                | 4.01                           | -0.59 – 8.62  | 0.087    |
| GWL                                                  | -0.01                          | -0.03 – 0.02  | 0.468    |
| GWL kat [Shallow]                                    | -0.76                          | -3.00 – 1.49  | 0.507    |
| Land use [Betula] * GWL                              | -0.01                          | -0.04 – 0.02  | 0.688    |
| Land use [Pinus] * GWL                               | 0.01                           | -0.03 – 0.05  | 0.659    |
| Land use [Vegetation] * GWL                          | -0.06                          | -0.12 – 0.00  | 0.053    |
| Land use [Betula] * GWL kat [Shallow]                | 4.28                           | 1.14 – 7.42   | 0.008    |
| Land use [Pinus] * GWL kat [Shallow]                 | 2.68                           | -0.93 – 6.29  | 0.146    |
| Land use [Vegetation] * GWL kat [Shallow]            | -1.28                          | -5.76 – 3.20  | 0.574    |
| GWL * GWL kat [Shallow]                              | -0.00                          | -0.06 – 0.05  | 0.932    |
| (Land use [Betula] * GWL) * GWL kat [Shallow]        | -0.08                          | -0.16 – -0.01 | 0.029    |
| (Land use [Pinus] * GWL) * GWL kat [Shallow]         | -0.02                          | -0.11 – 0.06  | 0.609    |
| (Land use [Vegetation] * GWL) * GWL kat [Shallow]    | 0.05                           | -0.04 – 0.14  | 0.271    |
| <b>Random Effects</b>                                |                                |               |          |
| $\sigma^2$                                           | 2.44                           |               |          |
| $\tau_{00}$ Object                                   | 1.60                           |               |          |
| ICC                                                  | 0.40                           |               |          |
| N Object                                             | 15                             |               |          |
| Observations                                         | 272                            |               |          |
| Marginal R <sup>2</sup> / Conditional R <sup>2</sup> | 0.500 / 0.698                  |               |          |
